# Supplementary figures and images for: Tuneable hydrogel patterns in pillarless microfluidic devices
Source: Royal Society of Chemistry journal article supplement (doi:10.1039/d3lc01082a), 2024-01-01

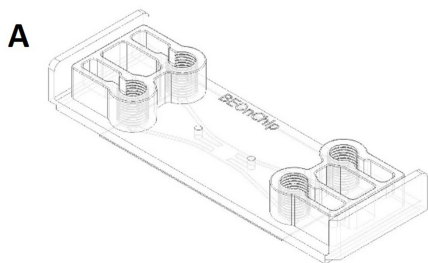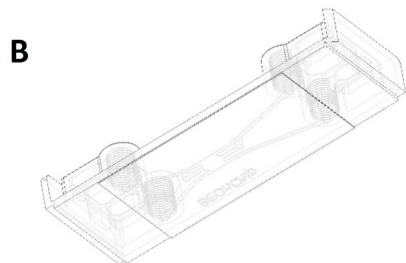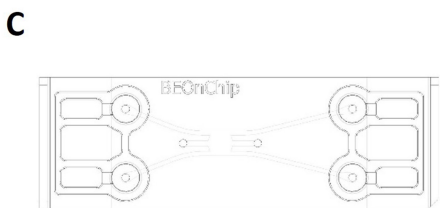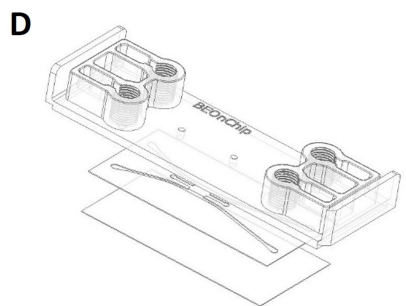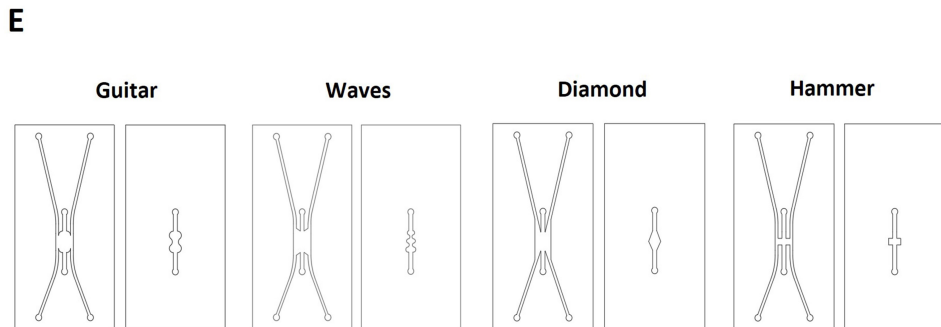

Supplement: d3lc01082a1.pdf [file d3lc01082a1.pdf]

A

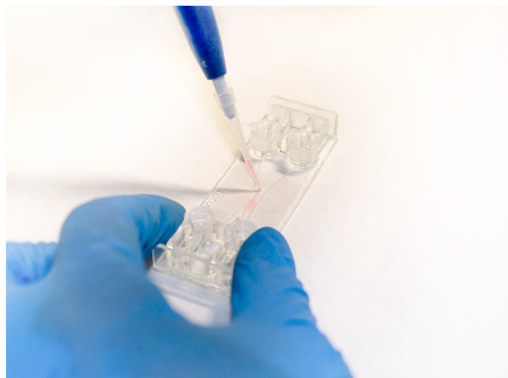

B

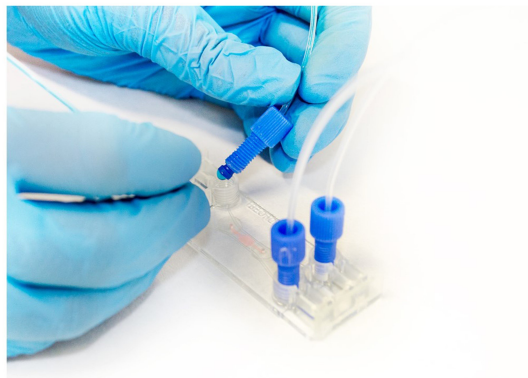

C

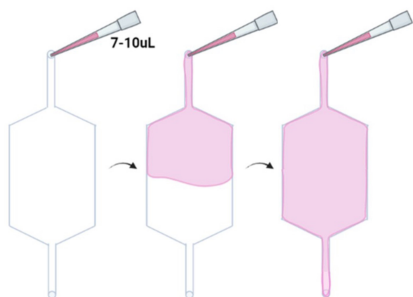

D

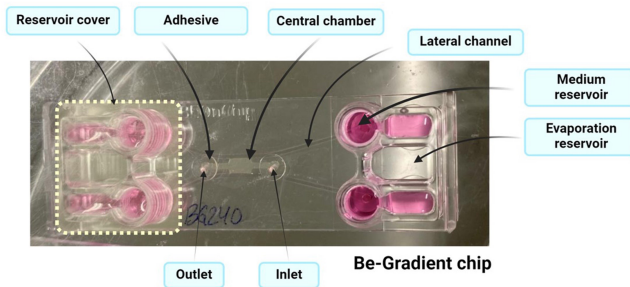

E

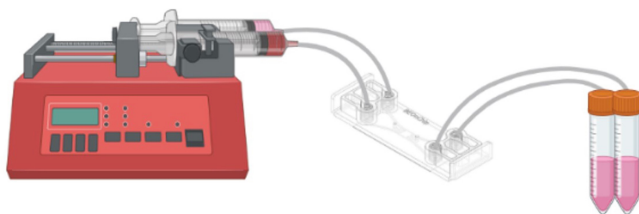

Supplement: d3lc01082a2.pdf [file d3lc01082a2.pdf]

### A Channel height

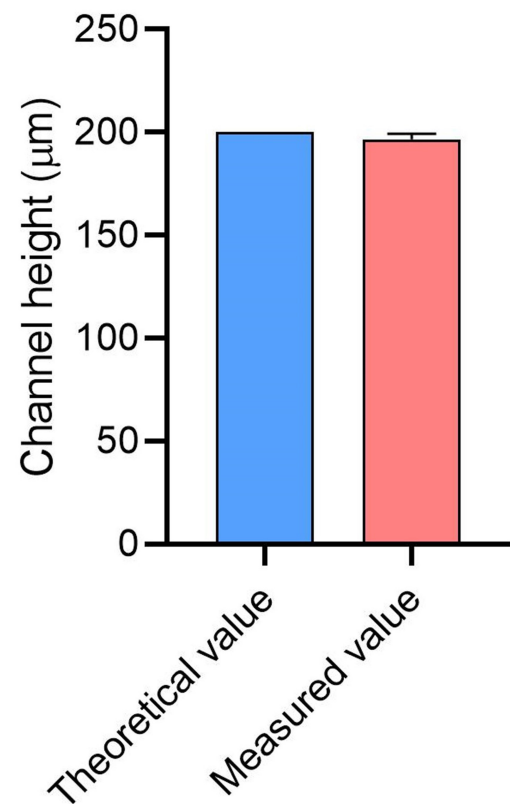

### B Chamber width

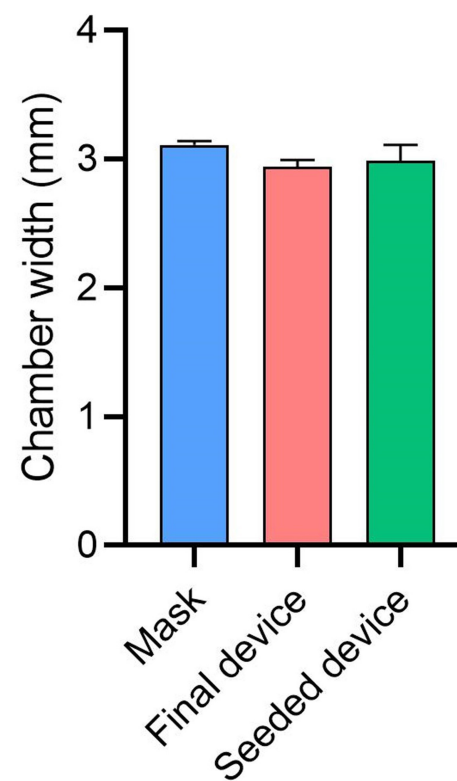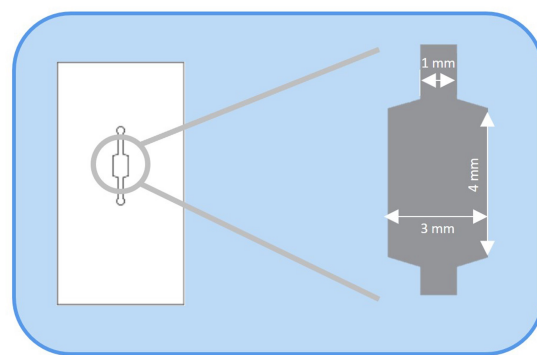

Mask

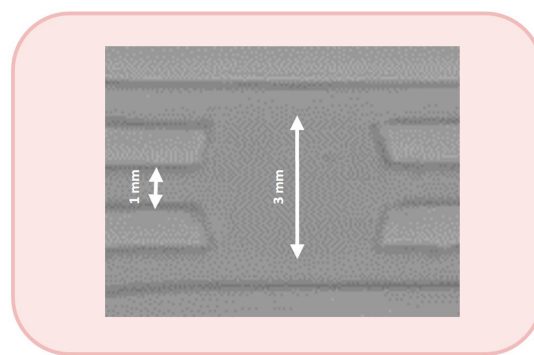

Final device

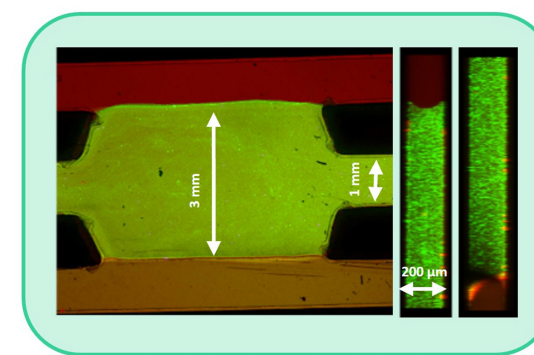

Seeded device

Supplement: d3lc01082a3.pdf [file d3lc01082a3.pdf]

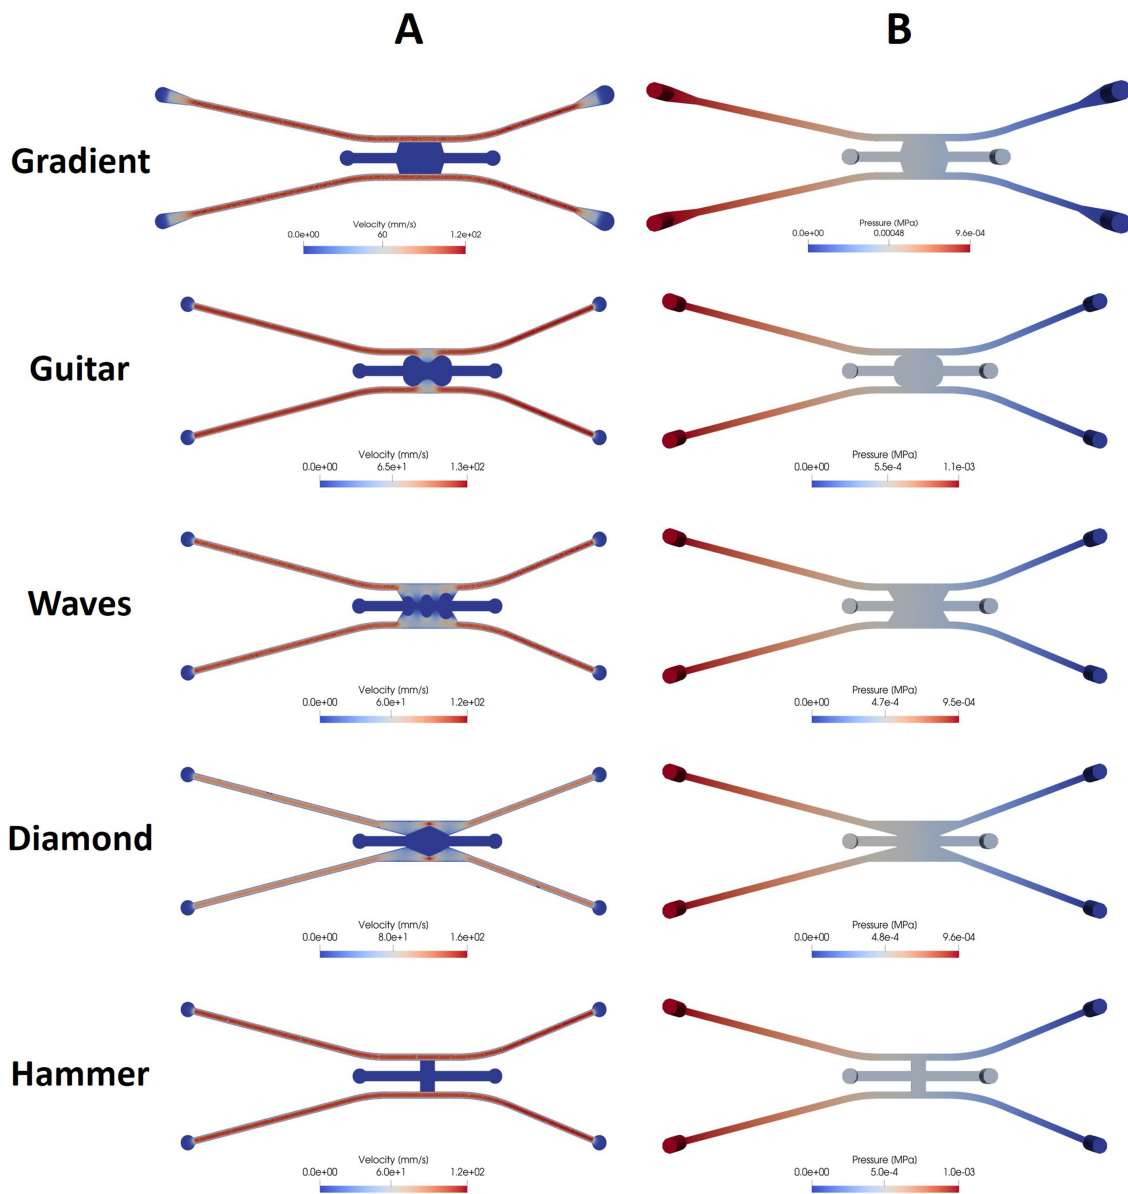

Supplement: d3lc01082a4.pdf [file d3lc01082a4.pdf]

**A**

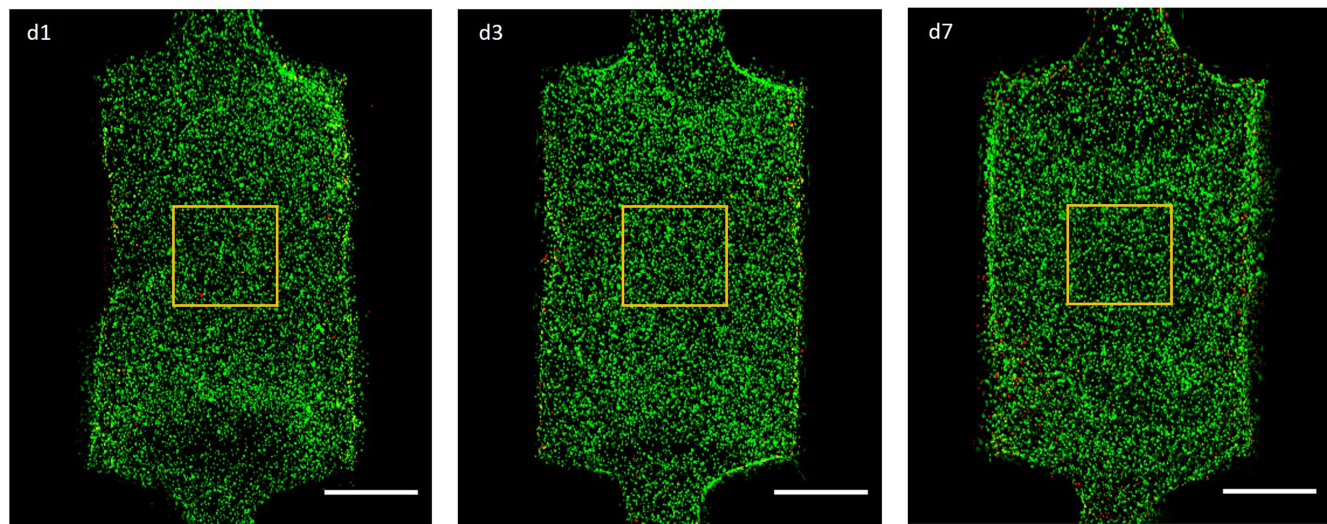

**B**

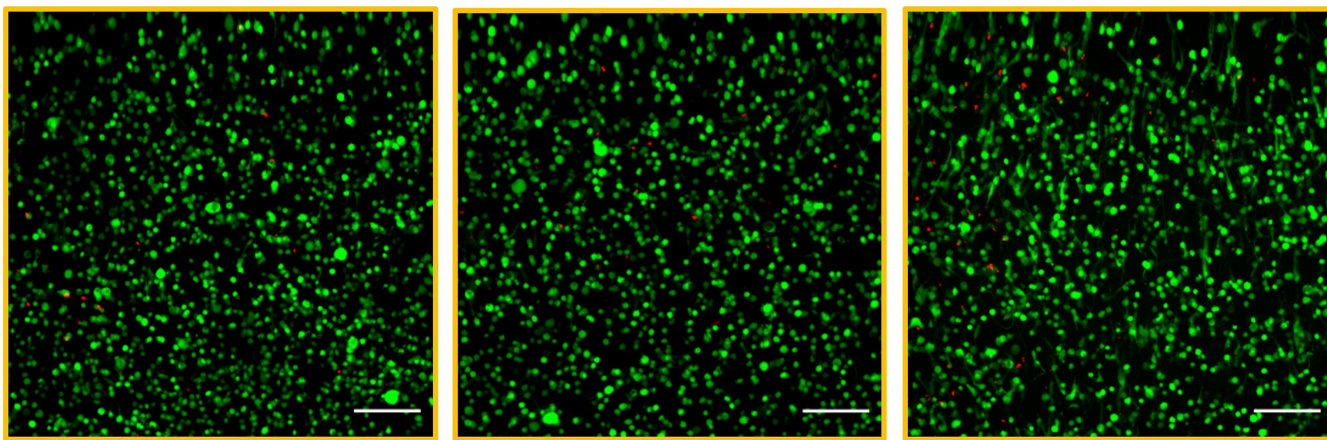

**C**

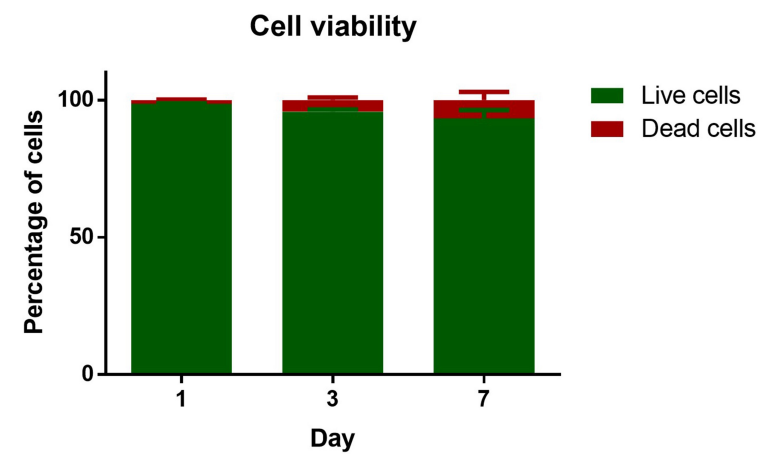

Supplement: d3lc01082a5.pdf [file d3lc01082a5.pdf]
